# Supplementary material for: Concise syntheses of tridentate PNE ligands and their coordination chemistry with palladium(ii) : a solution- and solid-state study
Source: Royal Society of Chemistry journal article supplement (doi:10.1039/b605995c), 2006-01-01

## Concise syntheses of tridentate PNE ligands and their coordination chemistry with palladium(II) : a solution- and solid-state study

Carly E. Anderson, David C. Apperley, Andrei S. Batsanov, Philip W. Dyer,\* and Judith A. K. Howard

*Department of Chemistry, University of Durham, South Road, Durham, UK DH1 3LE. Fax:*

*0191 384 4737; Tel: 0191 334 2150; E-mail: p.w.dyer@durham.ac.uk*

### Electronic Supplementary Information

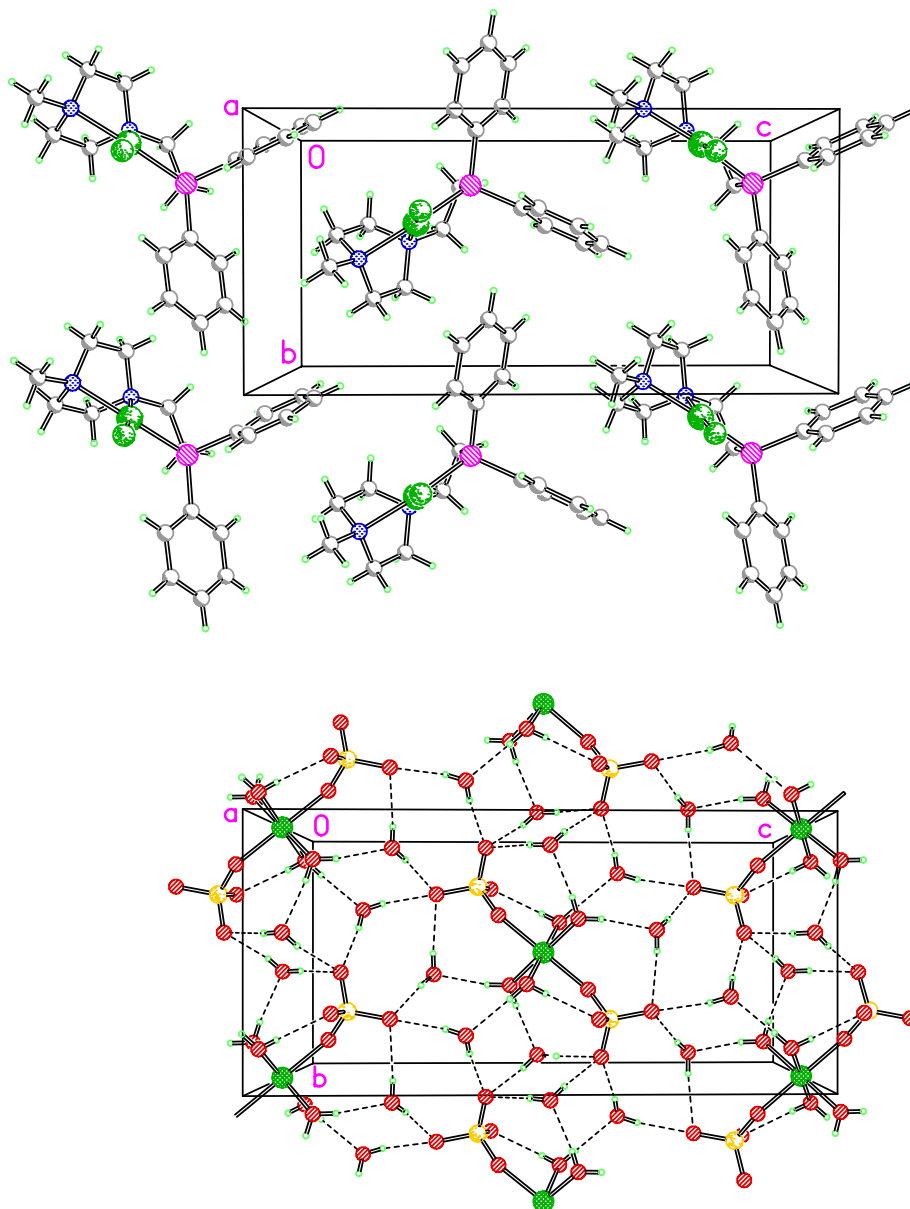

Supplement: b605995c.pdf [file b605995c.pdf]
